# Supplementary material
Source: publisher figshare collection journal article supplement (https://tandf.figshare.com/articles/dataset/_/6981767)
Supplement: Supplementary file 1 [file 1]

| Genesymbol | Seqname   | Forward primer          | Reverse primer        |
|------------|-----------|-------------------------|-----------------------|
| CCL4L2     | NR_111970 | ATGAAGCTCTGCGTGACTGT    | GCAGACTTGCTTGCCTTTGG  |
| FRG2EP     | NR_037925 | GGATGGGAGCCCAATCCAAA    | CGCTTGCTGCGCTAGT      |
| TRIM53AP   | NR_028346 | GCGGTGAATGAGCTCCAGAA    | AGGGAAGCCATCTGCTTCAAA |
| LINC00905  | NR_024335 | TACAACACGTGGTGCTGTTT    | TCGGAACCAGCTCTTCACAA  |
| WT1-AS     | NR_120547 | CAGCTTCCCAAAGCTCAAATAAG | GTGCGCCCTTCGAGTAAGTC  |
| DLEU1      | NR_109973 | TGAGGACACCTGAGGTTCAGA   | GGCTGGCAAAGGCTTCAATC  |
| LINC00704  | NR_024475 | GGAACCTGGAACGTGCTAA     | TGTGGGAAATGCAGGGTTCT  |
| LINC01427  | NR_110615 | ACGTCAGAGCTTGATGGAACA   | GGTGGTAAATCCGGGCTCTT  |
| SNHG4      | NR_036536 | CCTGAGCAGCTGCGAACTAT    | GGCCAACAGGAGCCTAAGTG  |
| GTF2H2B    | NR_033417 | TGTACTGCTACATCCACCAGAG  | GCCATGGCAGTCTTGTGAGT  |
| RPL32      | NM_000994 | CCATCTCCTTCTCGGCATCA    | GAGCGATCTCGGCACAGTAA  |

Supplementary table 1. The primer used in qRT-PCR for validation of the results of microarray
