# Supplementary material
Source: publisher figshare collection journal article supplement (https://tandf.figshare.com/articles/dataset/_/6981767)
Supplement: Supplementary file 2 [file 1]

## Supplementary figure legend

Supplementary Figure 1. Construction of co-expression network for 5 lncRNAs and 192 correlated mRNAs. Pearson correlation coefficients between the selected lncRNAs and all mRNAs were calculated, and the co-expression network was constructed using lncRNA-mRNA pairs with correlation coefficient  $\geq 0.999$  and  $FDR \leq 0.05$ . Among the 292 lncRNAs-mRNA pairs, 178 presented as a positive correlation and 114 presented as negative correlation. Red nodes: lncRNAs; blue nodes: mRNAs; solid lines: positive correlation; dotted lines: negative correlation.
